# Supplementary material
Source: HighWire-hosted journal article supplement (https://gh.bmj.com/content/3/3/e000794)
Supplement: inline-supplementary-material-1 [file inline-supplementary-material-1.pdf]

## Annexure

**Table A1. States in India, stratified by level of development and region**

|               | <i>Level of development</i> |                                    |                         |                                           |                   |                                                       |
|---------------|-----------------------------|------------------------------------|-------------------------|-------------------------------------------|-------------------|-------------------------------------------------------|
| <i>Region</i> | I (Most developed)          | II                                 | III                     | IV                                        | V                 | VI (least developed)                                  |
| North         | Delhi                       | Himachal Pradesh,<br><b>Punjab</b> | Haryana,<br>Uttarakhand |                                           | Jammu and Kashmir |                                                       |
| Central       |                             |                                    |                         |                                           | Chhattisgarh      | Madhya Pradesh,<br><b>Uttar Pradesh,</b><br>Rajasthan |
| East          |                             |                                    | <b>West Bengal</b>      |                                           | Odisha, Jharkhand | <b>Bihar</b>                                          |
| Northeast     | Sikkim                      | Mizoram, Tripura                   |                         | Manipur,<br>Nagaland,<br><b>Meghalaya</b> | Arunachal Pradesh | Assam                                                 |
| West          | Maharashtra, Goa            |                                    |                         | <b>Gujarat</b>                            |                   |                                                       |
| South         | <b>Kerala</b>               | Tamil Nadu                         | Karnataka               | Andhra Pradesh                            |                   |                                                       |

Note: States in bold were selected for the study

**Table A2. Basic Information for facilities, April 2013–March 2014**

|                                                        | <b>Bihar</b>       | <b>Gujarat</b>    | <b>Kerala</b>    | <b>Meghalaya</b>  | <b>Punjab</b>     | <b>Uttar Pradesh</b> | <b>West Bengal</b> |
|--------------------------------------------------------|--------------------|-------------------|------------------|-------------------|-------------------|----------------------|--------------------|
| <b>Sub-centre</b>                                      |                    |                   |                  |                   |                   |                      |                    |
| Sampled facilities                                     | 9                  | 20                | 12               | 9                 | 20                | 10                   | 19                 |
| Target population                                      | 9644 (6050–14000)  | 5987 (3044–15000) | 5743 (3165–9336) | 4048 (2628–6661)  | 6755 (4413–11438) | 6811 (4249–9986)     | 6246 (3899–12800)  |
| Target children (0–1 year)                             | 279 (182–420)      | 123 (42–217)      | 76 (31–171)      | 129 (72–190)      | 121 (64–233)      | 199 (115–300)        | 104 (40–299)       |
| Doses administered                                     | 2357 (1644–3650)   | 1364 (417–2537)   | 262 (71–663)     | 1334 (913–1979)   | 1416 (903–3438)   | 1988 (1366–2859)     | 1379 (458–4134)    |
| Sessions conducted (RI)                                | 120 (90–171)       | 48 (24–86)        | 18 (12–28)       | 81 (52–132)       | 62 (45–120)       | 80 (63–100)          | 40 (23–60)         |
| Children vaccinated with DPT3/pentavalent3             | 173 (104–291)      | 122 (33–221)      | 28 (7–81)        | 100 (65–150)      | 101 (66–233)      | 158 (85–234)         | 97 (35–285)        |
| Fully immunized children                               | 171 (104–240)      | 116 (39–197)      | 35 (8–89)        | 85 (41–135)       | 105 (66–237)      | 170 (86–260)         | 97 (36–269)        |
| DPT3/pentavalent3 coverage rate (%)                    | 62 (44–75)         | 100 (57–140)      | 38 (23–55)       | 84 (49–125)       | 88 (38–133)       | 79 (60–98)           | 94 (57–138)        |
| Full immunization coverage rate (%)                    | 62 (41–82)         | 97 (61–140)       | 44 (21–66)       | 73 (22–119)       | 90 (42–128)       | 87 (45–125)          | 95 (68–141)        |
| DPT1 to DPT3/pentavalent1 to pentavalent3 drop-out (%) | 12 (-14–33)        | 3 (-15–24)        | -63 (-163–11)    | 10 (-5–22)        | 4 (-20–31)        | -1 (-18–11)          | -1 (-27–19)        |
| Doses per fully immunized child                        | 14 (11–16)         | 12 (8–13)         | 9 (6–17)         | 16 (11–27)        | 14 (11–18)        | 12 (7–20)            | 14 (11–16)         |
| Doses per full-time equivalent                         | 22 (12–28)         | 25 (5–50)         | 5 (2–12)         | 14 (8–25)         | 16 (10–31)        | 36 (26–58)           | 18 (10–39)         |
| <b>Primary Health Centre</b>                           |                    |                   |                  |                   |                   |                      |                    |
| Sampled facilities                                     | 7                  | 18                | 12               | 13                | 16                | 6                    | 17                 |
| Target population                                      | 11907 (5000–21000) | 5824 (2710–11591) | 5223 (2988–8922) | 8475 (3261–24624) | 8195 (5265–30045) | 7863 (5300–10788)    | 8276 (3983–30000)  |
| Target children (0–1 year)                             | 345 (150–630)      | 129 (37–290)      | 74 (31–162)      | 273 (51–548)      | 135 (74–487)      | 229 (143–276)        | 136 (54–315)       |
| Doses administered                                     | 3119 (1652–5320)   | 1418 (300–3111)   | 1572 (334–4928)  | 2509 (682–4660)   | 1780 (1025–6091)  | 2467 (1837–2934)     | 1818 (695–4203)    |
| Sessions conducted (RI)                                | 127 (90–250)       | 64 (24–107)       | 54 (41–65)       | 128 (32–237)      | 60 (48–100)       | 81 (68–97)           | 37 (22–53)         |
| Children vaccinated with DPT3/pentavalent3             | 229 (133–431)      | 123 (34–256)      | 185 (40–568)     | 192 (43–373)      | 127 (51–434)      | 178 (117–227)        | 131 (45–314)       |
| Fully immunized children                               | 233 (123–406)      | 119 (27–261)      | 165 (37–473)     | 167 (38–288)      | 121 (66–366)      | 198 (147–330)        | 121 (46–291)       |
| DPT3/pentavalent3 coverage rate (%)                    | 68 (49–91)         | 98 (61–124)       | 219 (129–376)    | 75 (45–104)       | 96 (63–138)       | 74 (71–82)           | 96 (60–117)        |
| Full immunization coverage rate (%)                    | 70 (46–99)         | 94 (73–136)       | 202 (119–368)    | 67 (39–88)        | 95 (75–142)       | 92 (68–120)          | 89 (67–117)        |
| DPT1 to DPT3/pentavalent1 to pentavalent3 drop-out (%) | 17 (-5–37)         | -1 (-60–21)       | -61 (-274–1)     | 8 (-12–23)        | 4 (-34–41)        | 6 (-9–17)            | 0 (-23–17)         |
| Doses per fully immunized child                        | 14 (11–16)         | 12 (9–14)         | 9 (8–11)         | 15 (11–19)        | 14 (12–18)        | 13 (9–16)            | 15 (12–18)         |
| Doses per full-time equivalent                         | 28 (19–47)         | 8 (3–18)          | 7 (2–16)         | 12 (4–29)         | 16 (6–29)         | 28 (22–41)           | 16 (5–32)          |

|                                                        | Bihar               | Gujarat            | Kerala             | Meghalaya          | Punjab              | Uttar Pradesh       | West Bengal         |
|--------------------------------------------------------|---------------------|--------------------|--------------------|--------------------|---------------------|---------------------|---------------------|
| <b>Community Health Centre</b>                         |                     |                    |                    |                    |                     |                     |                     |
| Sampled facilities                                     | 5                   | 6                  | 6                  | 5                  | 8                   | 6                   | 8                   |
| Target population                                      | NA                  | NA                 | 6379 (4585–8557)   | 7609 (5457–11423)  | 11638 (5566–22000)  | 16362 (15157–17566) | 7463 (5354–9973)    |
| Target children (0–1 year)                             | NA                  | NA                 | 74 (43–101)        | 192 (94–322)       | 196 (103–330)       | 410 (380–439)       | 115 (82–144)        |
| Doses administered                                     | 11126 (408–29907)   | 1602 (283–3667)    | 2112 (535–5794)    | 2615 (1328–4659)   | 3459 (957–7931)     | 6493 (4195–10315)   | 1894 (1232–2411)    |
| Sessions conducted (RI)                                | 171 (89–285)        | 50 (45–60)         | 55 (50–62)         | 134 (60–252)       | 74 (44–116)         | 187 (88–312)        | 44 (36–60)          |
| Children vaccinated with DPT3/pentavalent3             | 568 (30–1588)       | 123 (3–309)        | 245 (65–643)       | 185 (90–362)       | 203 (58–412)        | 405 (221–655)       | 130 (91–191)        |
| Fully immunized children                               | 490 (21–1543)       | 131 (3–307)        | 214 (54–496)       | 179 (93–341)       | 200 (49–448)        | 443 (236–750)       | 137 (91–186)        |
| DPT3/pentavalent3 coverage rate (%)                    | —                   | —                  | 301 (96–670)       | 95 (70–117)        | 99 (52–163)         | 92 (77–107)         | 111 (87–133)        |
| Full immunization coverage rate (%)                    | —                   | —                  | 272 (79–517)       | 93 (73–111)        | 96 (44–177)         | 121 (111–131)       | 118 (87–171)        |
| DPT1 to DPT3/pentavalent1 to pentavalent3 drop-out (%) | 13 (-25–53)         | 13 (-17–35)        | -50 (-81–4)        | 11 (-6–29)         | 8 (-18–32)          | 13 (-6–25)          | 3 (-6–20)           |
| Doses per fully immunized child                        | 23 (13–42)          | 27 (10–94)         | 9 (7–12)           | 15 (14–17)         | 18 (14–27)          | 16 (9–22)           | 14 (12–16)          |
| Doses per full-time equivalent                         | 23 (2–44)           | 29 (3–54)          | 7 (2–16)           | 12 (8–20)          | 18 (7–33)           | 26 (19–38)          | 10 (6–14)           |
| <b>District Hospital Post-partum Unit</b>              |                     |                    |                    |                    |                     |                     |                     |
| Sampled facilities                                     | 3                   | 4                  | 3                  | 3                  | 4                   | 2                   | 4                   |
| Doses administered                                     | 48202 (36840–67858) | 13122 (3073–23538) | 17128 (6991–23224) | 13502 (4472–26792) | 19054 (16039–22711) | 48934 (21703–76164) | 37212 (15879–55618) |
| Sessions conducted (RI)                                | 285                 | 144 (96–240)       | 101 (96–104)       | 188 (50–285)       | 175 (48–285)        | 136 (104–168)       | 158 (92–285)        |
| Children vaccinated with DPT3/pentavalent3             | 2082 (1451–3296)    | 448 (188–751)      | 807 (368–1407)     | 533 (223–734)      | 1026 (290–1655)     | 2259 (1177–3341)    | 962 (138–2768)      |
| Fully immunized children                               | 1880 (1304–2930)    | 395 (141–672)      | 695 (294–1254)     | 443 (222–605)      | 932 (263–1372)      | 2380 (1055–3704)    | 1020 (145–3104)     |
| DPT1 to DPT3/pentavalent1 to pentavalent3 drop-out (%) | 29 (22–42)          | 20 (12–39)         | 33 (0–61)          | 19 (11–34)         | 14 (-2–32)          | 24 (18–30)          | 25 (8–43)           |
| Doses per fully immunized child                        | 27(23–28)           | 31 (22–35)         | 28 (17–43)         | 30 (15–53)         | 29 (16–66)          | 21                  | 96 (15–212)         |
| Doses per full-time equivalent                         | 115 (57–208)        | 51 (17–71)         | 34 (22–49)         | 63 (39–90)         | 91 (50–139)         | 132 (103–161)       | 99 (70–123)         |

Notes: Average and figures in parentheses indicate range. NA indicates not available. Blanks indicate unable to calculate.
